# Supplementary material for: Snail Upregulates Transcription of FN, LEF, COX2, and COL1A1 in Hepatocellular Carcinoma: A General Model Established for Snail to Transactivate Mesenchymal Genes
Source: MDPI journal article supplement (doi:10.3390/cells10092202), 2021-08-26
Supplement: s1 [file s1]

Article

# Snail Upregulates Transcription of FN, LEF, COX2, and COL1A1 in Hepatocellular Carcinoma: A General Model Established for Snail to Transactivate Mesenchymal Genes

Tam Minh Ly <sup>1</sup>, Yen-Cheng Chen <sup>2</sup>, Ming-Che Lee <sup>3</sup>, Chi-Tan Hu <sup>4</sup>, Chuan Chu Chen <sup>5</sup>, Hsin-Hou Chang <sup>6</sup>, Ren-In You <sup>5,\*</sup> and Wen-Sheng Wu <sup>2,\*</sup>

## Supplemental data

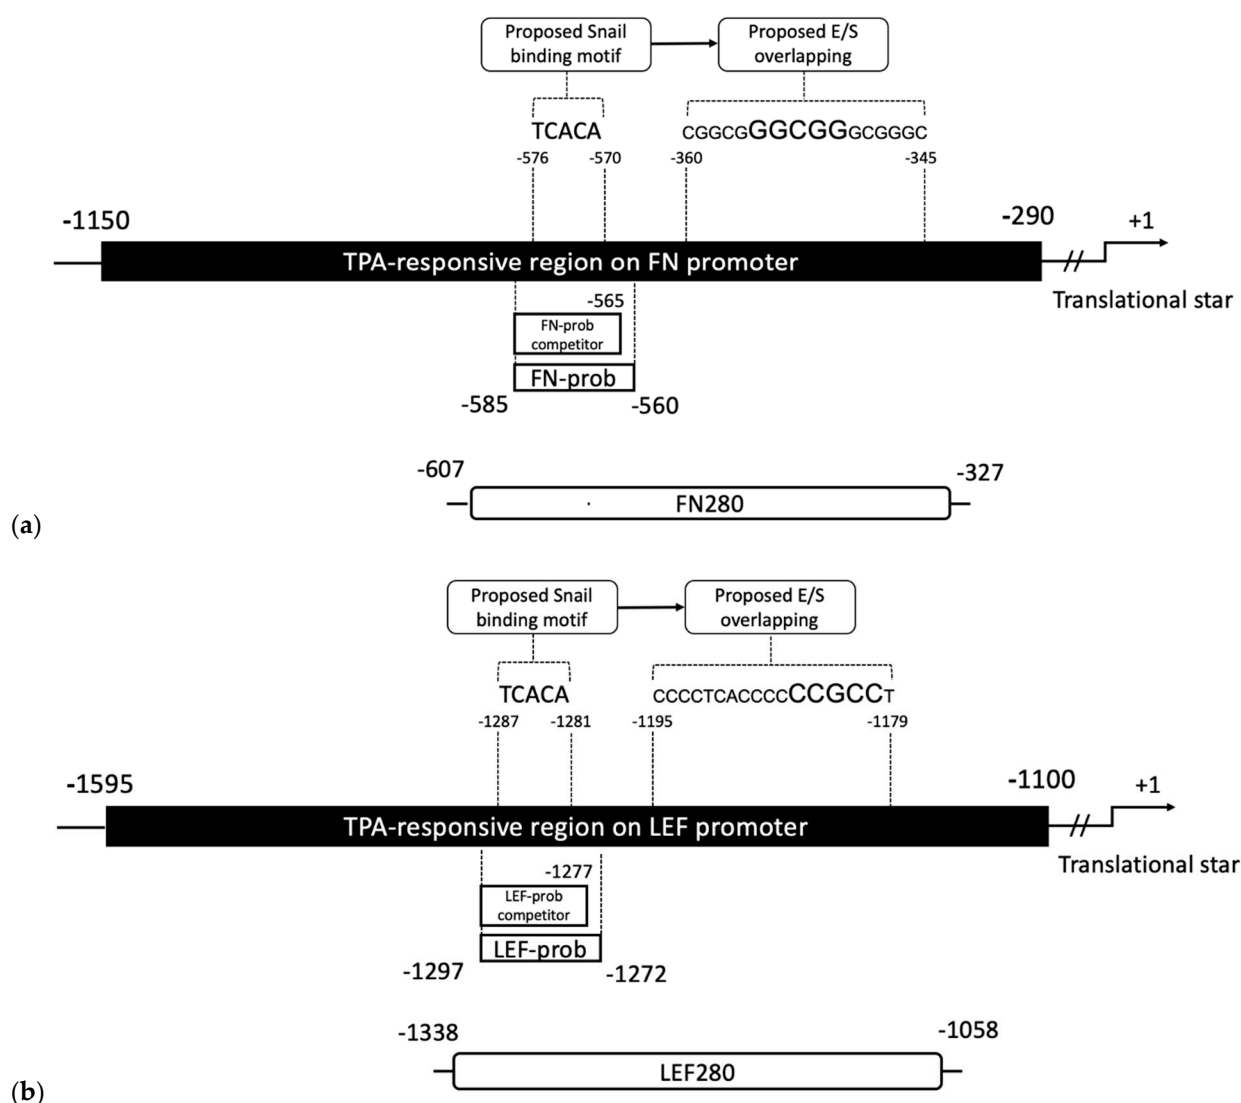

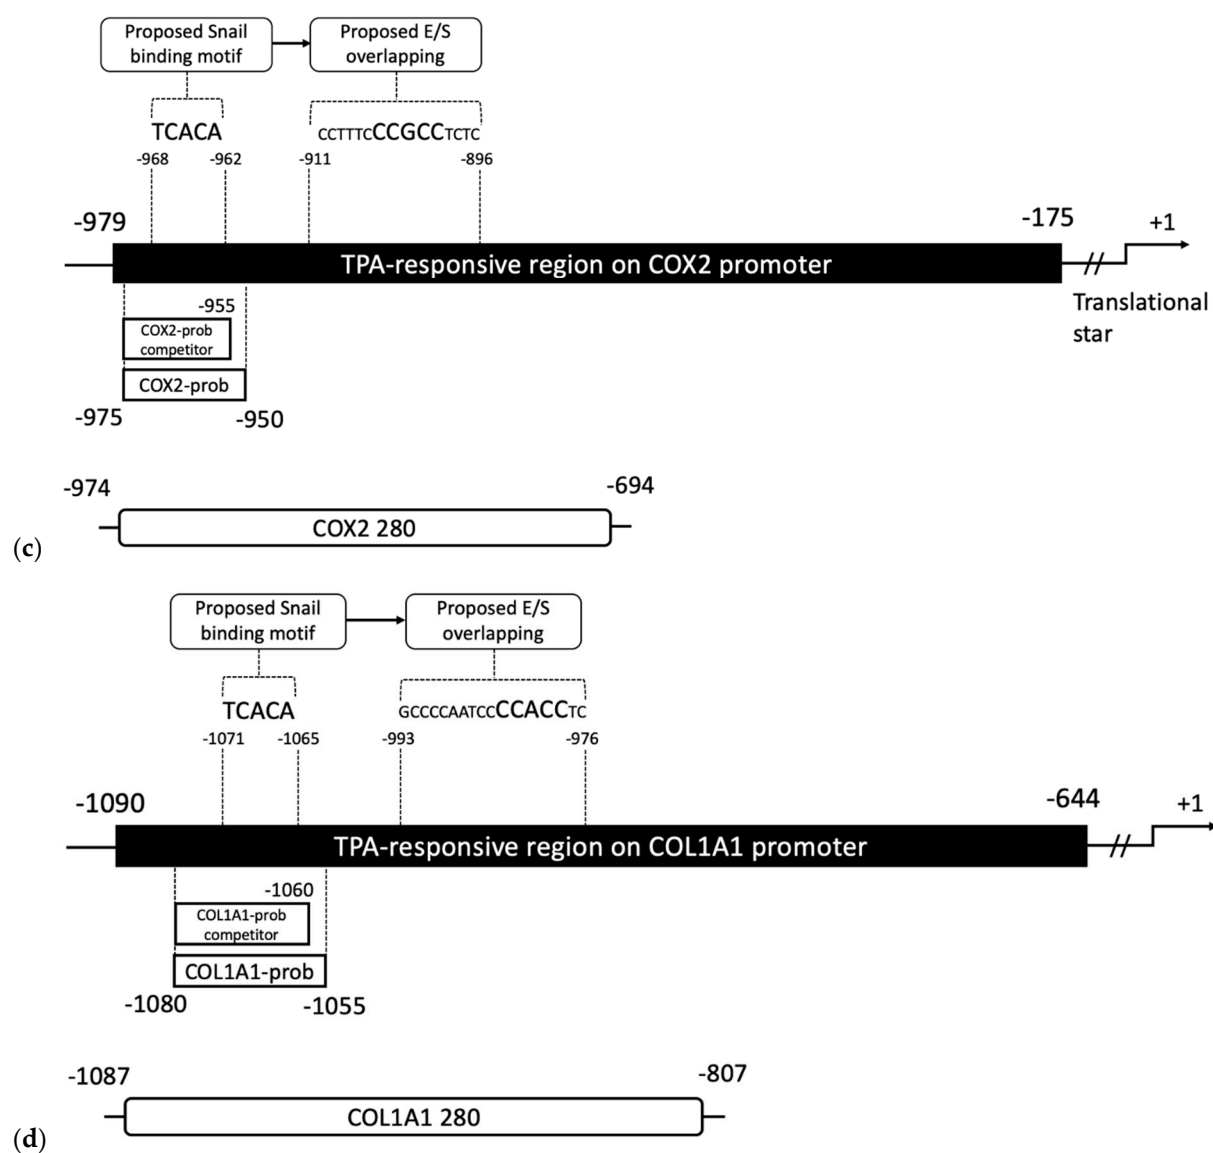

**Supplemental Figure S1.** Map for ChIP fragment and EMSA probe for FN, LEF, COX2 and COL1A1 promoter. Schematic MAP showing the PCR fragments amplified for the ChIP assay of SNA, EGR1/SP1 overlapping; and EMSA probe on FN (a), LEF (b), COX2 (c) and COL1A1 (d) promoters.

(a)

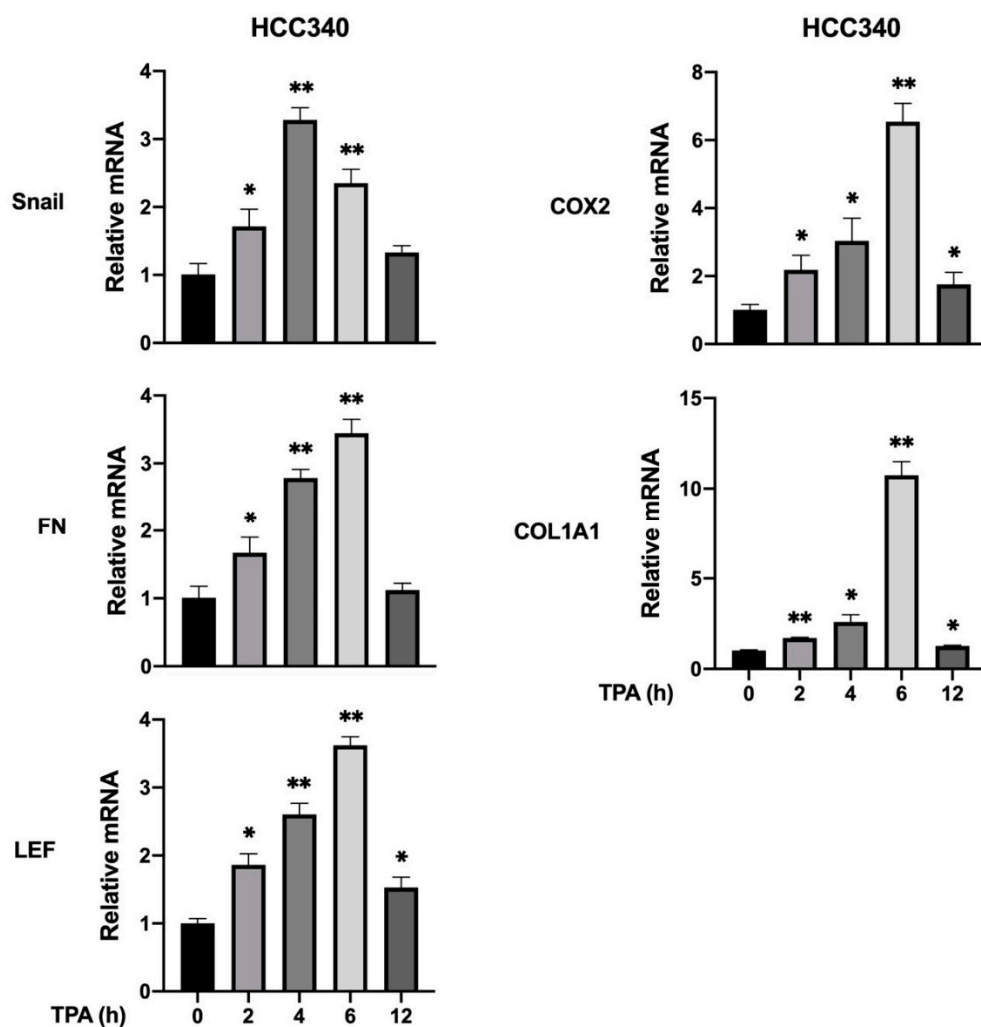

(b)

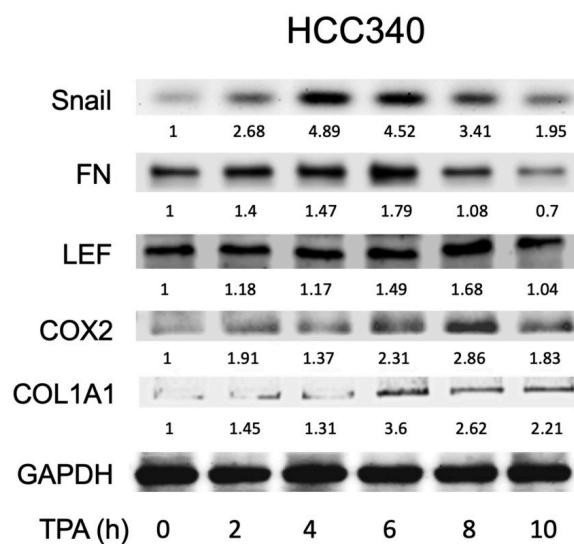

**Supplemental Figure S2.** Time course of TPA-induced gene expression of SNA, FN, LEF, COX2, and COL1A1 in HCC340. HCC340 cells were treated with 50 nM TPA for indicated time (a, b) Q-RT/PCRs (a) and Western blot (b) of Table 0.  $p < 0.01$ ,  $N=3$ ) between the indicated samples and time zero. In (b), the numbers indicated below each band are averaged relative intensities (Coefficient of Variation: 7–10%) taking time zero as 1.0.

(a)

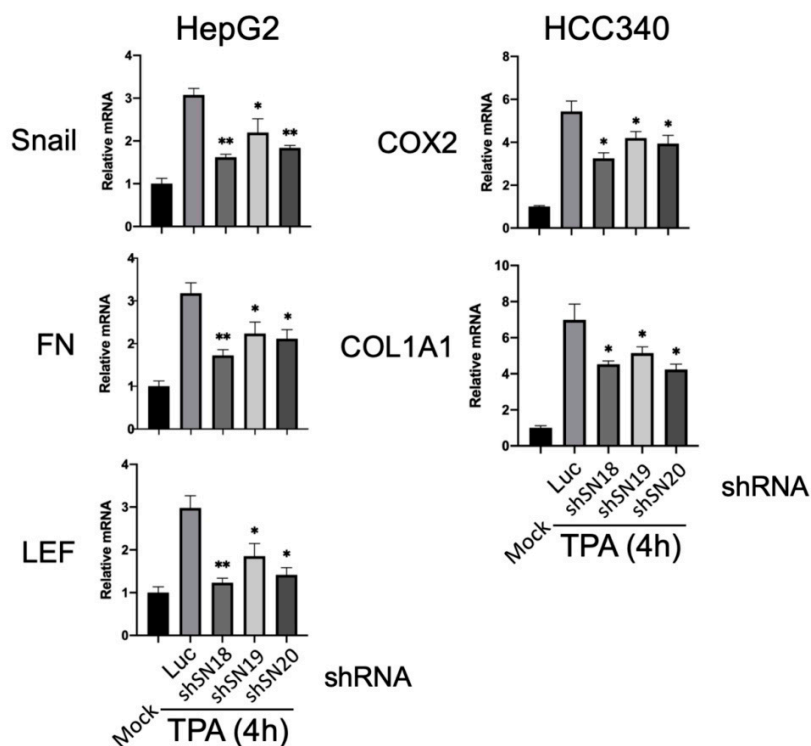

(b)

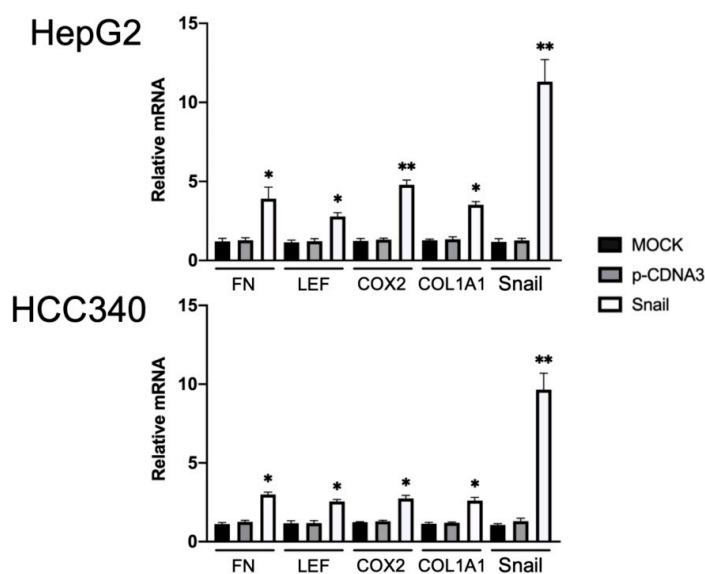

(c)

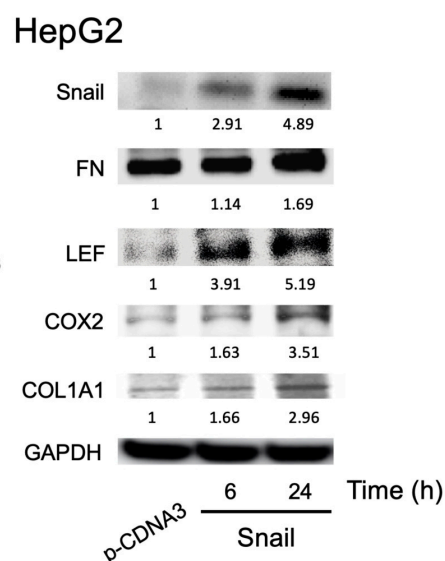

**Supplemental Figure S3.** SNA is essential for constitutive and TPA-induced gene expression of FN, LEF, COX2, and COL1A1. HepG2 and HCC340 cells were transfected with luciferase (Luc) shRNA or three different shRNA of SNA for 24 h followed by TPA treatment for 4 h (a); HepG2 and HCC340 were transfected with SNA expressing

plasmid for 24h (b) or indicated time (c), using p-cDNA3 as a control vector. Q-RT/PCRs (a), (b) and Western blot (c) of the indicated genes were performed using GAPDH as an internal control. In (a) and (b), (\*, \*\*) represent the statistically significant difference ( $p < 0.05$ ,  $p < 0.01$ ,  $N=3$ ) between the indicated samples and Luciferase shRNA (a) or p-cDNA3 group (b). The data in (c) are representative of three reproducible results. The numbers indicated below each band are averaged relative intensities (Coefficient of Variation: 7-10%) taking p-cDNA3 group as 1.0.

## HCC340

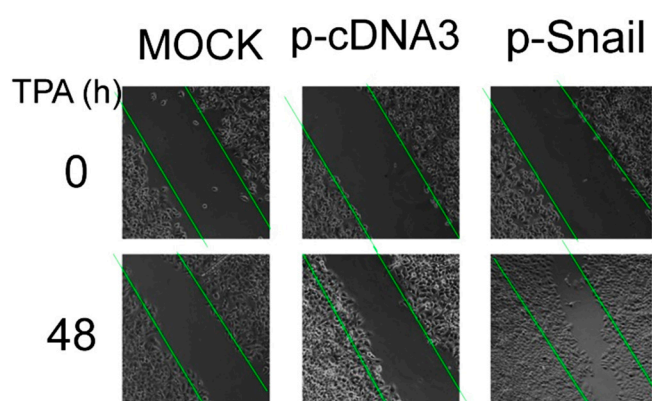

## HepG2

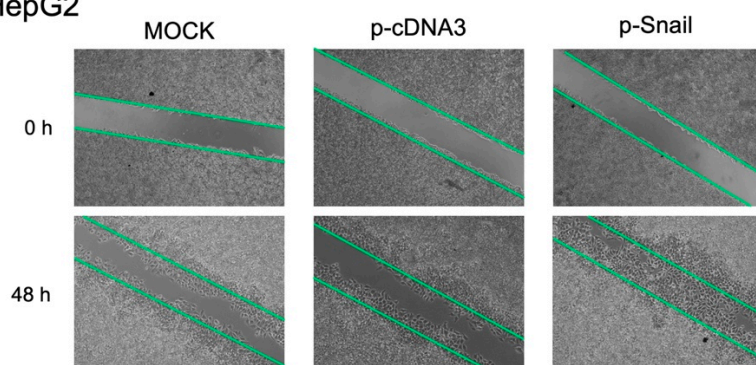

**Supplemental Figure S4.** SNA overexpression increased motility of HCC340. HCC340 (upper panel) and HepG2 (lower panel) were untransfected (MOCK), transfected with Snail expression plasmid (p-Snail) or control vector (p-cDNA3) for 48 h followed by wound healing assay for 48 h. Pictures were taken at 0 and 24 h after the cells begin to move into the wound area between green lines under serum free condition. Motility of the cell were compared by the difference of the cell migrated into the wound area (indicated by green arrow head).

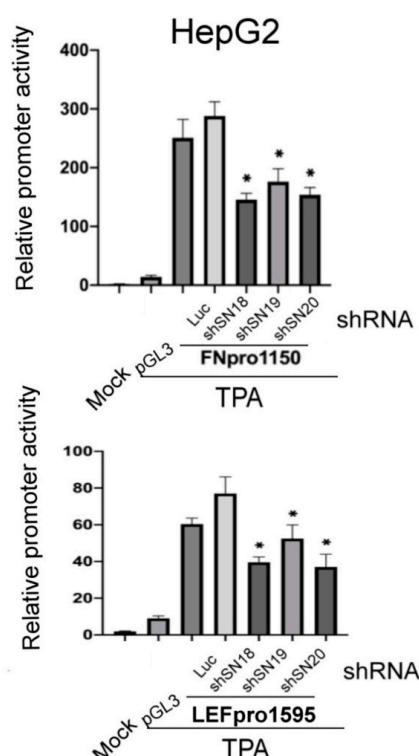

**Supplemental Figure S5.** SNA is required for TPA-induced promoter activation of FN and LEF in HepG2. HepG2 cells were untransfected (MOCK), transfected with none or various shRNA as indicated for 24 h. Then, the cells were transfected with full-length promoter of FN (upper panel) or LEF (lower panel) for 16 h, followed by treatment with none (MOCK) or TPA for 12 h. Dual luciferase was performed. Relative luciferase activity was calculated, taking the data of MOCK as 1.0. (\*, \*\*) represent the statistically significant difference ( $p < 0.05$ ,  $p < 0.001$ ,  $N = 3$ ) between the indicated samples and Luc shRNA control group.

a. Homo sapiens fibronectin 1 (FN1), RefSeqGene on chromosome 2, NCBI Reference Sequence: NG\_012196.1

1150 SN1  
 CTGGTCCAACCTTTCCAATTTTCAGGTTGTTCACAGTGATTTCACTTTCACTGGAACGGGCGTCCCATC  
 CCCAGGAAAGGAAGGCTTTCTGCATGTGTAAAAAAGTAACTGTTACTTTGTCTTGCAAAAGAAAAC  
 TCATTCTCTGAACCTTCCCCGGGATCTGCAAAGCGCCCCGCGGAACCTCCCGTACTTAGTAGAAGCTCATT  
 AAAGGTCTCTGTTCCCTTTGCTCCCCGTTGCGCCGCTGGCCCTTTCTCAGAGCCAGACAGGCACAGCGC  
 TGAGAAGGGAAGAAGTCCGAACAGGGAGCTGTGAAGACAAAATAAGGGAGTCCCGAGTCAGTACCCTTTA  
 750  
 GTCCAAAGAAAGGGAGCGGGATGGGGGGAAAGGCAGCCCCGCCCTGGGACTGAAAAGTCTGGATTCTTAA  
 SN2 700  
 CAGCTGCAAGGTCGTGGATATTTTATGGGTTTTCTTCCACACAAAATACACTCCTATAAGCAGAGATTCC  
 CCCCCTCCACCCGAAGAGAGGTGACGCAATGTCCTCAAACACTACCACCACCCCAATAAAAAAGAAAA  
 SN3 568  
 GGGAAGGGGGAGCGTCTTGCAACCCCTTCGCTTCACACAAGTCCAGCCACTCCCTTTCTCCAGCCGCT  
 TCCCATCCCTTCCCCCATCCCCATAAAAGTTTGATGACCGCAAAGGAAACCGAAAAAAGTTGTCTTGCC  
 CCAGTCCTGGCGGGCCATCAGCATCTCTTTTGTTCGCTGCGAACCCACAGTCCCCCGTGACGTACCCGG  
 E/S overlapping 330  
 AGCCCGGGCCAATCGGCGCGCGGTTCGGCTGCGGCGGC CGGCGGGCGGGCGGGCGGGTGGGGTGGGGC GGG  
 290  
 GCGGGGACAGCCCGGCGGGTCTCTCTCTCCCCGCGCCCGGGCCTCCAGAGGGGCGGGAGGGGACCGTCC  
 .....ACAGCGGTGCCCTCCACGGGAGCCTCGAAGAGCAAGAGGCAGGCTCAGCAAATG



CTCCCCACTGTCAGAGCATCT **1595** / ATCAATGTGGTGTCCA **SN1** TCACA GCGGCAGCGGCTTTCTCTTTCATCTT  
 CTCCCTCTGCCAGAGCCAGGGAGGGAGAGTGGGAGGCGTCAAGGAGGTAGGGGAGAGACTGGCAGAGGA  
 AAGGAGTGGGTGGGTGGGGGCCAAGTAAATAGATACTTAGATGATGAAGTCAAGCCACTGCGGCAATGT  
 TCTTGTCAGTTTCACGCGGGCAAAGCGTGCCTTTCGGTGGGTTATAAGCAGCGCCCGGTCTTTCCTTCT  
 TCGCAAGTTGCCTGATCCTTCCCTCCAGGCGCGCGC / GCACACACCACAC **SN2** TCACA CACCCCAAACCAA  
 ACTCGTCCTACAGGATCTGGGAAAAGAAAAGAAA / AAAAGCCCTCAATCACCACCTCCTTCTCGCCGA  
**E/S overlapping 1** **1231** **E/S overlapping 2**  
 TC **CCCCCTACCCCCCGCCT** CCCCCTCAGCGGGCAGCCAAGGAGAGCTAGA **GGCGGGGGAGGGGAGAG** GG  
**1100**  
 GGAGAAGCGACGCAA / GTGGGTAGCTTTTCAGCGCCGGCGAGGCGGGAGGAGGAGAAGCAGTGGGGAG  
 .....AGCGGAGCGGAGATTACAGAGCCGCCGGG **ATC**

TCCATCAGAAGGCAGGAACTTTATATTGGT **979** GACCCGTGGAGC **SN** TCACA TTAAC TATTTACAGGGTAACT  
**921** **E/S overlapping**  
GCTTAGGACCAGTATTATGA **979** GGAGAATTTA **CCTTTCCCGCCTCTC** TTTCCAAGAAACAAGGAGGGGGTGA  
AGGTACGGAGAACAGTATTTCTTCTGTTGAAAGCAACTTAGCTACAAAGATAAATTACAGCTATGTACAC  
TGAAGGTAGCTATTTTCATTCCACAAAATAAGAGTTTTTTAAAAAGCTATGTATGTATGTGCTGCATATAG  
AGCAGATATACAGCCTATTAAGCGTCGTCCTAAACATAAAACATGTGAGCCTTTCTTAACCTTACTCG  
CCCCAGTCTGTCCCGACGTGACTTCCTCGACCCCTCTAAAGACGTACAGACCAGACACGGCGGGCGGGCGGCG  
GGAGAGGGGATTCCCTGCGCCCCCGGACCTCAGGGCCGCTCAGATTCTTGAGAGGAAGCCAAGTGTCTCT  
TCTGCCCTCCCCCGGTATCCCATCCAAGGCGATCAGTCCAGAAGTGGCTCTCGGAAGCGCTCGGGCAAAG  
ACTGCGAAGAAGAAAAGACATCTGGCGGAAACCTGTGCGCCTGGGGCGGTGGAAGTCTGGGGAGGAGAGGG  
**362** **175**  
AGGGATCAGACAGGAGAGT **979** GGGGACTA.....CATGGGCTTGGTTTT **979** CAGT  
CTTATAAAAAGGAAGGTTCTCTCGGTTAGCGACCAATTGTCATACGACTTGCAGTGAGCGTCAGGAGCAC  
GTCCAGGAAGTCTCAGCAGCGCCTCCTTCAGCTCCACAGCCAGACGCCCTCAGACAGCAAAGCCTACCC  
CCGCGCCGCGCCCTGCCCCGCCGCTGCG **ATG**

GGGTCTCTAAGCAGCCCCTGGCCACAGCCATGGCAAACAAAATCTTTCTCTAAGTCACCAATGATCACA  
GGCCTCCCACTAAAAATACTTCCCAACTCTGGGGTGGAAAGAGTTTGGGGGATGAATTTTTAGGGGATTGC

**E/S overlapping**

AAGCCCCAATCCCCACCTCTGTGTCCCTAGAATCCCCCACCCTACCTTGGCTGCTCCATCACCCAACCA  
CCAAAGCTTTCTTCTGCAGAGGCCACCTAGTCATGTTTCTCACCCTGCACCTCAGCCTCCCCACTCCATC  
TCTCAATCATGCCTAGGGTTTGGAGGAAGGCATTTGATTCTGTTCTGGAGCACAGCAGAAGAATTGACAT  
CCTCAAATTTAAATCTCCCTTGCTGCACCCCTCCCTCAGATATCTGATTCTTAATGTCTAGAAAGGAAT  
CTGTAAATTGTTCCCCAAATATTCCCTAAGCTCCATCCCCTAGCCACACCAGAAGACACCCCCAAACAGGC

**644**

ACATCTTTTTTAATTCCCAGCTTCCTCTGTTT.....TGTCTAGGGTCTAGACATC

**Supplemental Figure S6.** Promoter sequences of FN, LEF, COX2, and COL1A1 containing Snail and EGR/SP1 overlapping region. Promoter region of FN (a), LEF (b), COX2 (c), and COL1A1 (d) quoted from gene bank.

(a)

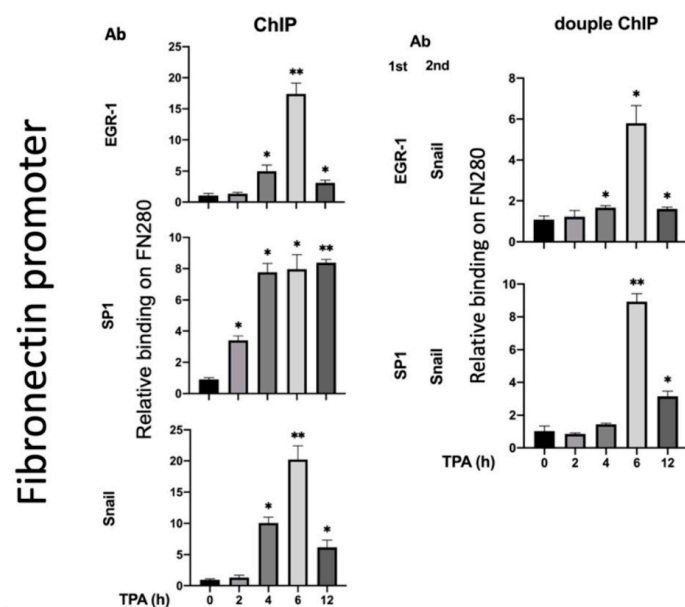

(b)

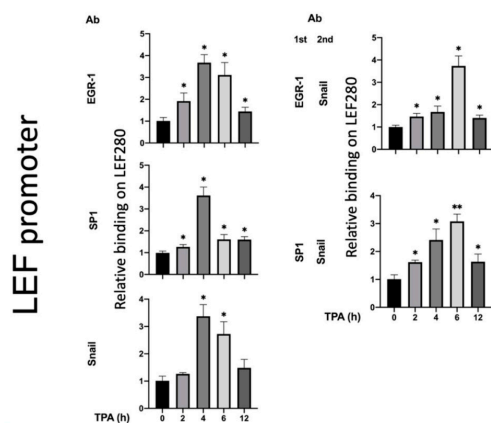

**Supplemental Figure S7.** Quantitative PCR for ChIP and double ChIP assay for TPA induced binding of Table 340. HCC340 cells were treated with TPA at indicated time. Single ChIP for binding of indicated transcription factor on FN promoter (FN280) (a, left panel) and LEF promoter (LEF280) (b, left panel), and double ChIP for association of indicated transcriptional factor on FN280 (a, right panel) and LEF280 (b, right panel) were performed using quantitative PCR. (\*, \*\*) represent the statistically significant difference ( $p < 0.05$ ,  $p < 0.01$ ,  $N = 3$ ) between the indicated samples and time zero.
